# Supplementary material
Source: Copernicus journal article supplement (doi:10.5194/egusphere-2026-3442)
Supplement: Supplementary file 1 [file egusphere-2026-3442-supplement.pdf]

## Supporting Information for

# Unveiling carbonate dissolution in coastal sediments and its influence on seawater buffering capacity with $\delta^{13}\text{C}_{\text{DIC}}$ and $^{224}\text{Ra}$ – $^{228}\text{Th}$ disequilibria

Xinjie Ma<sup>1,2</sup>, Xiangming Shi<sup>1,2\*</sup>, Yingxu Wu<sup>1,2</sup>, Xiangqi Yi<sup>1,2</sup>, Biqi Zheng<sup>3</sup>, Di Qi<sup>1,2\*</sup>

<sup>1</sup>State Key Laboratory of Mariculture Breeding, Jimei University, Xiamen, 361021, China.

<sup>2</sup>Polar and Marine Research Institute, Jimei University, Xiamen, 361021, China.

<sup>3</sup>Ningde Marine Center, Ministry of Natural Resources, Ningde, 352000, China.

\*Corresponding author: Xiangming Shi ([xiangming.shi@jmu.edu.cn](mailto:xiangming.shi@jmu.edu.cn)), Di Qi ([qidi@jmu.edu.cn](mailto:qidi@jmu.edu.cn))

### Contents of this file

Table S1 to S4

Figure S1 to S3

Table S1. Porosities ( $\Phi$ ), activities of  $^{224}\text{Ra}$  and  $^{228}\text{Th}$  and total inorganic carbon (TIC) in sediments at each sampling station. The errors refer to  $\pm 1\sigma$  derived from counting statistics, which is calculated from  $\frac{\sqrt{N}}{t}$ .

| Depth (cm)                                                           | $\Phi$ | $^{224}\text{Ra}$ (dpm g <sup>-1</sup> ) | $^{228}\text{Th}$ (dpm g <sup>-1</sup> ) | TIC (mg C g <sup>-1</sup> ) |
|----------------------------------------------------------------------|--------|------------------------------------------|------------------------------------------|-----------------------------|
| <b>SSW-A; 119.94°E, 26.73°N; Depth = 4 m; T = 19.8°C; S = 29.3</b>   |        |                                          |                                          |                             |
| 0-1                                                                  | 0.739  | 1.84 ± 0.11                              | 2.08 ± 0.07                              | 15.4                        |
| 1-2                                                                  | 0.726  | 1.75 ± 0.11                              | 2.29 ± 0.07                              | 16.7                        |
| 2-3                                                                  | 0.721  | 1.57 ± 0.09                              | 1.70 ± 0.05                              | 18.4                        |
| 3-4                                                                  | 0.713  | 1.83 ± 0.11                              | 2.05 ± 0.06                              | 16.4                        |
| 5-6                                                                  | 0.696  | 1.51 ± 0.09                              | 1.65 ± 0.05                              | 19.4                        |
| 7-8                                                                  | 0.677  | 1.79 ± 0.12                              | 2.00 ± 0.06                              | 23.8                        |
| 9-10                                                                 | 0.643  | 1.64 ± 0.11                              | 1.89 ± 0.06                              | 35.4                        |
| 12-13                                                                | 0.657  | 3.00 ± 0.20                              | 3.25 ± 0.10                              | 29.2                        |
| 15-16                                                                | 0.677  | 2.79 ± 0.18                              | 2.79 ± 0.09                              | 16.6                        |
| 19-20                                                                | 0.657  | 1.88 ± 0.12                              | 1.86 ± 0.06                              | 17.7                        |
| <b>SSW-B; 119.83°E, 26.66°N; Depth = 8.7 m; T = 20.2°C; S = 28.0</b> |        |                                          |                                          |                             |
| 0-1                                                                  | 0.723  | 2.18 ± 0.13                              | 2.39 ± 0.08                              | 16.8                        |
| 1-2                                                                  | 0.705  | 1.83 ± 0.10                              | 2.01 ± 0.06                              | 16.4                        |
| 2-3                                                                  | 0.690  | 2.28 ± 0.12                              | 2.29 ± 0.07                              | 16.3                        |
| 3-4                                                                  | 0.698  | 2.05 ± 0.11                              | 1.94 ± 0.06                              | 16.7                        |
| 5-6                                                                  | 0.676  | 1.57 ± 0.09                              | 1.53 ± 0.05                              | 17.2                        |
| 7-8                                                                  | 0.600  | 1.53 ± 0.09                              | 1.61 ± 0.05                              | 15.9                        |
| 9-10                                                                 | 0.620  | 1.34 ± 0.09                              | 1.40 ± 0.05                              | 16.1                        |
| 11-12                                                                | 0.629  | 1.64 ± 0.11                              | 1.83 ± 0.06                              | 17.4                        |
| 14-15                                                                | 0.612  | 1.78 ± 0.11                              | 1.83 ± 0.06                              | 16.9                        |
| 17-18                                                                | 0.622  | 2.04 ± 0.12                              | 2.01 ± 0.06                              | 15.2                        |
| 20-21                                                                | 0.628  | 1.40 ± 0.09                              | 1.58 ± 0.05                              | 16.8                        |
| <b>SSW-C; 119.86°E, 26.52°N; Depth = 6 m; T = 16.2°C; S = 31.1</b>   |        |                                          |                                          |                             |
| 0-1                                                                  | 0.706  | 3.29 ± 0.21                              | 3.33 ± 0.11                              | 10.3                        |
| 1-2                                                                  | 0.674  | 1.70 ± 0.10                              | 2.01 ± 0.06                              | 11.5                        |
| 2-3                                                                  | 0.643  | 2.25 ± 0.13                              | 2.47 ± 0.08                              | 11.5                        |
| 3-4                                                                  | 0.626  | 2.54 ± 0.15                              | 2.81 ± 0.09                              | 11.6                        |
| 5-6                                                                  | 0.612  | 2.80 ± 0.19                              | 3.25 ± 0.11                              | 12.1                        |
| 7-8                                                                  | 0.599  | 3.44 ± 0.24                              | 3.96 ± 0.14                              | 11.0                        |
| 9-10                                                                 | 0.644  | 4.55 ± 0.29                              | 4.54 ± 0.16                              | 11.3                        |
| 12-13                                                                | 0.588  | 3.12 ± 0.20                              | 3.19 ± 0.11                              | 11.8                        |

"Depth" indicates the water depth at the sampling station. "T" and "S" represent the temperature and salinity of bottom water, respectively, based on in-situ measurements. N:  $^{220}\text{Rn}$  counts in the RaDeCC.  
t: counting time for one sample.

Table S2. Activities of dissolved  $^{224}\text{Ra}$  (D- $^{224}\text{Ra}$ ) in bottom water and porewater at each sampling station. The errors refer to  $\pm 1\sigma$  derived from counting statistics, which is calculated from  $\frac{\sqrt{N}}{t}$ .

| Depth (cm)   | D- $^{224}\text{Ra}$ (dpm L $^{-1}$ ) |
|--------------|---------------------------------------|
| <b>SSW-A</b> |                                       |
| BW           | 0.39 $\pm$ 0.02                       |
| 0-1          | 3.97 $\pm$ 0.77                       |
| 1-2          | 12.80 $\pm$ 1.67                      |
| 2-4          | 17.76 $\pm$ 1.71                      |
| 4-6          | 19.70 $\pm$ 1.94                      |
| 6-8          | 25.78 $\pm$ 2.35                      |
| <b>SSW-B</b> |                                       |
| BW           | 0.23 $\pm$ 0.02                       |
| 0-1          | 7.91 $\pm$ 1.25                       |
| 1-2          | 11.44 $\pm$ 1.39                      |
| 2-4          | 17.40 $\pm$ 1.71                      |
| 4-6          | 15.47 $\pm$ 1.78                      |
| 6-8          | 15.38 $\pm$ 1.88                      |
| 8-10         | 17.53 $\pm$ 1.93                      |
| 10-14        | 18.14 $\pm$ 2.13                      |
| 14-18        | 11.21 $\pm$ 1.62                      |
| 18-22        | 17.91 $\pm$ 1.76                      |
| 22-27        | 17.90 $\pm$ 1.99                      |
| <b>SSW-C</b> |                                       |
| BW           | 0.11 $\pm$ 0.01                       |
| 0-1          | 26.37 $\pm$ 3.07                      |
| 1-2          | 16.17 $\pm$ 1.92                      |
| 2-4          | 52.38 $\pm$ 3.14                      |
| 4-6          | 36.65 $\pm$ 2.67                      |
| 6-8          | 32.79 $\pm$ 2.80                      |

N:  $^{220}\text{Rn}$  counts in the RaDeCC.

t: counting time for one sample.

Table S3. Concentrations of DIC and TA (mean  $\pm$  1SD) in bottom water and porewater at each sampling station. The errors refer to the standard deviation (1SD) of duplicates at SSW-A and SSW-C, and 1SD of triplicates at SSW-B. The last column refers to the theoretical porewater  $\delta^{13}\text{C}_{\text{DIC}}$  calculated as a result of TOC degradation only (data for red plots in Fig. 4b)

| Depth (cm)   | DIC ( $\mu\text{mol kg}^{-1}$ ) | TA ( $\mu\text{mol kg}^{-1}$ ) | $\delta^{13}\text{C}_{\text{DIC-calculate}}$ (‰) |
|--------------|---------------------------------|--------------------------------|--------------------------------------------------|
| <b>SSW-A</b> |                                 |                                |                                                  |
| BW           | 2229                            | 2357 $\pm$ 39                  |                                                  |
| 0-1          | 2539                            | 2650 $\pm$ 20                  | -5.7                                             |
| 1-2          | 2468                            | 2499 $\pm$ 90                  | -5.2                                             |
| 2-3          | 2639                            |                                | -6.3                                             |
| 3-4          | 2590                            | 2467 $\pm$ 82                  | -6.0                                             |
| 4-5          | —                               |                                | -7.5                                             |
| 5-6          | 2843                            | 2580 $\pm$ 26                  | —                                                |
| 6-7          | —                               |                                | -7.7                                             |
| 7-8          | 2868                            | 3081 $\pm$ 79                  | —                                                |
| 9-10         | 2926                            | —                              | -8.0                                             |
| <b>SSW-B</b> |                                 |                                |                                                  |
| BW           | 1964                            | 1982 $\pm$ 4                   |                                                  |
| 0-1          | 2634                            | 2455 $\pm$ 6                   | -7.2                                             |
| 1-2          | 2752                            | 2588 $\pm$ 29                  | -7.9                                             |
| 2-3          | 2991                            | 2749 $\pm$ 7                   | -9.1                                             |
| 3-4          | 3007                            | 2675 $\pm$ 9                   | -9.2                                             |
| 5-6          | 2883                            | 2626 $\pm$ 16                  | -8.6                                             |
| 7-8          | 2578                            | 2426 $\pm$ 7                   | -6.9                                             |
| 9-10         | 2581                            | 2341 $\pm$ 8                   | -6.9                                             |
| 11-12        | 2700                            | 2326 $\pm$ 5                   | -7.6                                             |
| 14-15        | 2319                            | 2333 $\pm$ 6                   | -5.1                                             |
| 17-18        | 2324                            | 2607 $\pm$ 15                  | -5.1                                             |
| 20-21        | 2184                            | 2800 $\pm$ 5                   | -4.0                                             |
| <b>SSW-C</b> |                                 |                                |                                                  |
| BW           | 2051                            | 2243 $\pm$ 37                  |                                                  |
| 0-1          | 2571                            | 2612 $\pm$ 33                  | -6.7                                             |
| 1-2          | 2484                            | 2692 $\pm$ 44                  | -6.1                                             |
| 2-3          | 2714                            |                                | -7.5                                             |
| 3-4          | 2619                            | 2866 $\pm$ 51                  | -7.0                                             |
| 4-5          | —                               |                                | —                                                |
| 5-6          | 2826                            | 2914 $\pm$ 21                  | -8.1                                             |
| 6-7          | —                               |                                | —                                                |
| 7-8          | 2863                            | 2714 $\pm$ 82                  | -8.3                                             |

“—” denotes that samples were not collected.

Table S4. Porewater  $\delta^{13}\text{C}_{\text{DIC}}$  values and contribution proportions of  $\text{CaCO}_3$  dissolution ( $f_{\text{CaCO}_3}$ ) and organic carbon degradation ( $f_{\text{TOC}}$ ) to the porewater DIC of each layer.

| Depth (cm)   | $\delta^{13}\text{C}_{\text{DIC}}$ (‰) | $\frac{[\text{DIC}]_{\text{PW}} - [\text{DIC}]_{\text{BW}}}{[\text{DIC}]_{\text{PW}}}$ (%) | $f_{\text{CaCO}_3}$ (%) | $f_{\text{TOC}}$ (%) | $f_{\text{CaCO}_3}/f_{\text{TOC}}$ |
|--------------|----------------------------------------|--------------------------------------------------------------------------------------------|-------------------------|----------------------|------------------------------------|
| <b>SSW-A</b> |                                        |                                                                                            |                         |                      |                                    |
| BW           | -3.3                                   |                                                                                            |                         |                      |                                    |
| 1-2          | -4.5                                   | 9.6                                                                                        | 3.9                     | 5.6                  | 0.70                               |
| 4-6          | -5.0                                   | 21.5                                                                                       | 13.4                    | 8.1                  | 1.65                               |
| 6-8          | -5.4                                   | 22.2                                                                                       | 12.2                    | 10.0                 | 1.22                               |
| <b>SSW-B</b> |                                        |                                                                                            |                         |                      |                                    |
| BW           | -1.8                                   |                                                                                            |                         |                      |                                    |
| 0-1          | -4.9                                   | 25.5                                                                                       | 12.2                    | 13.2                 | 0.92                               |
| 1-2          | -5.4                                   | 28.6                                                                                       | 13.3                    | 15.3                 | 0.87                               |
| 2-3          | -5.8                                   | 34.3                                                                                       | 17.5                    | 16.8                 | 1.04                               |
| 3-4          | -6.0                                   | 34.7                                                                                       | 16.7                    | 18.0                 | 0.93                               |
| 5-6          | -5.8                                   | 31.9                                                                                       | 14.7                    | 17.2                 | 0.85                               |
| 7-8          | -4.8                                   | 23.8                                                                                       | 10.9                    | 13.0                 | 0.84                               |
| 9-10         | -4.9                                   | 23.9                                                                                       | 10.4                    | 13.5                 | 0.77                               |
| 11-12        | -5.3                                   | 27.3                                                                                       | 12.1                    | 15.2                 | 0.80                               |
| 14-15        | -3.9                                   | 15.3                                                                                       | 6.1                     | 9.2                  | 0.66                               |
| 17-18        | -3.9                                   | 15.5                                                                                       | 6.2                     | 9.3                  | 0.67                               |
| 20-21        | -3.3                                   | 10.1                                                                                       | 3.6                     | 6.5                  | 0.55                               |
| <b>SSW-C</b> |                                        |                                                                                            |                         |                      |                                    |
| BW           | -2.7                                   |                                                                                            |                         |                      |                                    |
| 0-1          | -5.0                                   | 19.6                                                                                       | 8.6                     | 11.0                 | 0.78                               |
| 1-2          | -5.8                                   | 16.8                                                                                       | 1.9                     | 14.9                 | 0.13                               |
| 2-4          | -6.3                                   | 22.5                                                                                       | 5.0                     | 17.5                 | 0.29                               |
| 4-6          | -6.7                                   | 26.9                                                                                       | 7.7                     | 19.2                 | 0.40                               |
| 6-8          | -7.0                                   | 27.8                                                                                       | 7.3                     | 20.5                 | 0.36                               |

$\frac{[\text{DIC}]_{\text{PW}} - [\text{DIC}]_{\text{BW}}}{[\text{DIC}]_{\text{PW}}}$  represents the total contribution of  $\text{CaCO}_3$  dissolution and organic carbon degradation to porewater  $\delta^{13}\text{C}_{\text{DIC}}$ .

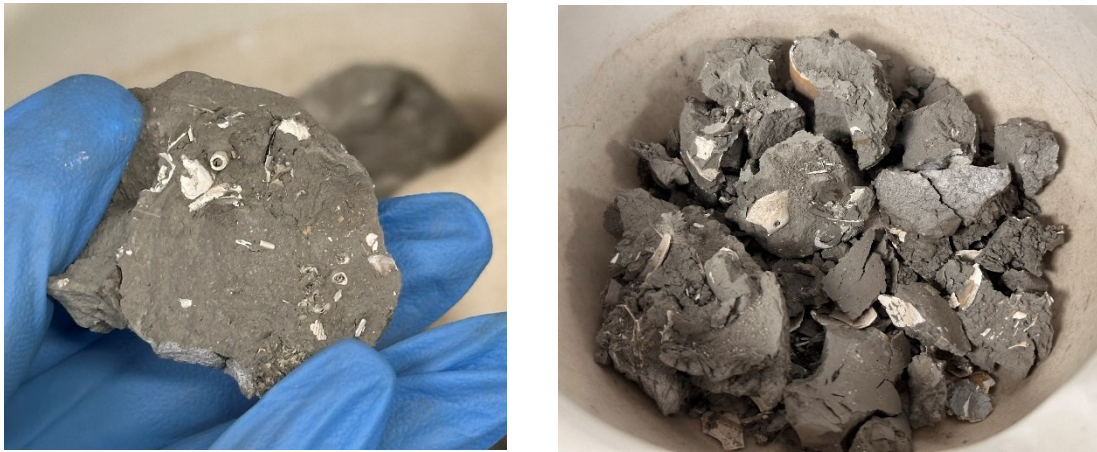

Fig. S1. The detritus of benthic biota within sediments, including bivalve shells and calcareous tube fragments of polychaetes.

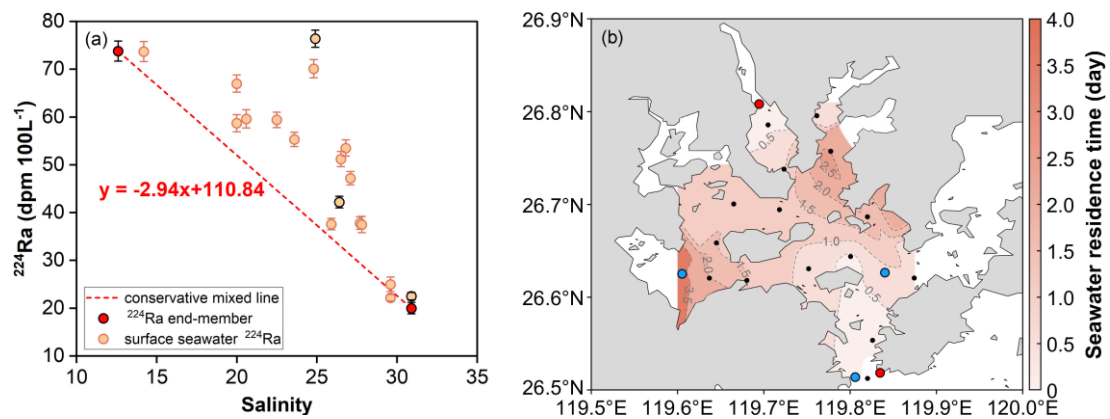

Fig. S2. (a) Conservative mixing line of  $^{224}\text{Ra}$  versus salinity in surface seawater of Sandu Bay. Data are adapted from Wang et al. (2018). (b) Residence time of bay waters ( $\tau$ ) calculated from excess  $^{224}\text{Ra}$  above the conservative line ( $\Delta\text{Ra}$ ). Red circles represent the stations where  $^{224}\text{Ra}$  was selected for the mixing line. Blue circles mark the locations where representative  $\tau$  was used.

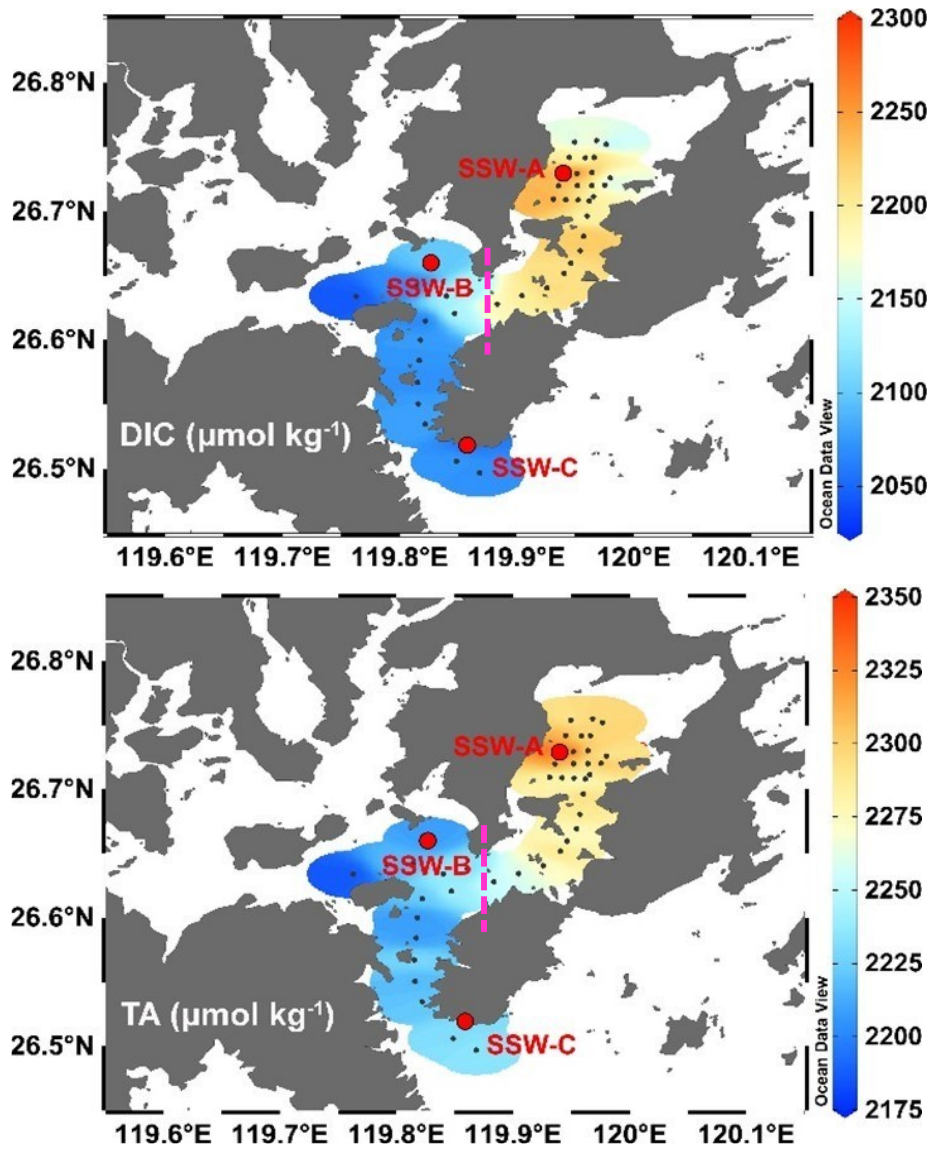

Fig. S3. Distributions of DIC (upper) and TA (lower) in surface seawater of Sansha Bay in April 2024. Data for the figures have been published in Liu et al. (2025). Data are available in the Mendeley Data repository (<https://data.mendeley.com/datasets/ykd3kv453d/1>). The pink dash line represents the edge of Dongwuyang. In Section 4.2, the average DIC and TA concentrations in Dongwuyang ( $2205 \mu\text{mol kg}^{-1}$  and  $2290 \mu\text{mol kg}^{-1}$ , respectively) were calculated from all stations on the right side of the dash. The average levels of DIC and TA in the main channel were derived from the stations on the left side, as a result of  $2081 \mu\text{mol kg}^{-1}$  and  $2226 \mu\text{mol kg}^{-1}$ , respectively.
